# Supplementary material for: Boosting the efficiency of site-saturation mutagenesis for a difficult-to-randomize gene by a two-step PCR strategy
Source: PubMed Central journal article supplement (PMC6013526; doi:10.1007/s00253-018-9041-2), 2018-05-21
Supplement: 253_2018_9041_MOESM1_ESM.pdf [file 253_2018_9041_MOESM1_ESM.pdf]

## Supplementary Materials

### *Applied Microbiology and Biotechnology*

#### **Boosting the Efficiency of Site-Saturation Mutagenesis for a Difficult-to-Randomize Gene by a Two-Step PCR Strategy**

Aitao Li,<sup>a,b,c</sup> Carlos G. Acevedo-Rocha,<sup>d</sup> and Manfred T. Reetz<sup>b,c\*</sup>

<sup>a</sup>Hubei Collaborative Innovation Center for Green Transformation of Bio-resources, Hubei Key Laboratory of Industrial Biotechnology, College of Life Sciences, Hubei University, 430062, Wuhan, China.

<sup>b</sup>Max-Planck-Institut für Kohlenforschung, Kaiser-Wilhelm-Platz 1, 45470 Muelheim, Germany

<sup>c</sup>Department of Chemistry, Philipps-University, Hans-Meerwein-Strasse 4, 35032 Marburg, Germany

<sup>d</sup>Biosyntia ApS, Copenhagen, 2100 Denmark

#### **Corresponding author**

Manfred T. Reetz

Phone: +49 6421 28 25500

Email: [reetz@mpi-muelheim.mpg.de](mailto:reetz@mpi-muelheim.mpg.de)

#### **ORCID**

Aitao Li: 0000-0001-6036-4058

Manfred T. Reetz : 0000-0001-6246-647X

## Legends of figures and tables

**Fig. S1.** The plasmid pRSFduet-1 harboring P450-BM3 gene with a total length of 3222 bp. The heme domain sequence of P450-BM3 is underlined, the target positions are bold-marked.

**Fig. S2.** Sequencing chromatograms for NNK-based library Y51X generated from one-step PCR or two-step PCR processes.

**Fig. S3.** Sequencing chromatograms for NNK-based library S72X generated from one-step PCR or two-step PCR processes.

**Fig. S4.** Sequencing chromatograms for NNK-based library L75X generated from one-step PCR or two-step PCR processes.

**Fig. S5.** Sequencing chromatograms for NNK-based library L437X generated from one-step PCR or two-step PCR processes.

**Fig. S6.** Sequencing chromatograms for NNK-based library T438X generated from one-step PCR or two-step PCR processes.

**Fig. S7.** Comparison of number of colonies developed on the agar plates for different NNK-based SSM libraries. (A) SSM libraries constructed by partially over-lapped primer in one-step PCR process; (B) SSM libraries constructed by non-overlapping primer in two-step PCR process.

**Fig. S8.** Comparison of amino acid distribution for different positions (Y51, S72, L75, L437 and T438) for both one-step PCR and two-step PCR methods.

**Table S1.** Sequence of primers used in this study.

**Table S2.** Screening results of one-step PCR approach with partially overlapped primer for NNK-based site-saturation mutagenesis.

**Table S3.** Screening results of two-step PCR approach with non-overlapping primers for NNK-based site-saturation mutagenesis.

ATGAAACATCACCATCACCATCACCCCATGAGCGATTACGACATCCCCACTACTGAGAAT  
CTTTATTTTCAGGGCGCAATTAAGAAATGCCTCAGCCAAAAACGTTTGGAGAGCTTAAA  
AATTTACCGTTATTAACACAGATAAACCGGTTCAAGCTTTGATGAAAATTGCGGATGAA  
TTAGGAGAAATCTTTAAATTCGAGGCGCCTGGTTGGGTAACGCGCT**ACTTATCAAGTCAGC**  
GTCTAATTAAGAAGCATGCGATGAATCACGCTTTGATAAAAACTT**ATCGCAAGCGCTTA**  
AATACCTAAGAGAATTCCTAGGAGACGGGTTAGGATTAAGCTGGACGCATGAAAAAATT  
GGAAAAAGCGCATAATATCTTACTTCCAAGCTTCAGTCAGCAGGCAATGAAAGGCTATC  
ATGCGATGATGGTTCGATATCGCCGTGCAGCTTGTTCAAAAAGTGGGAGCGTCTAAATGCAG  
ATGAGCATATTGAAGTACCGGAAGACATGACACGTTTAAACGCTTGATACAATTGGTCTTTG  
CGGCTTTAACTATCGCTTAAACAGCTTTTACCGAGATCAGCCTCATCCATTTATTACAAGT  
ATGGTCCGTGCACTGGATGAAGCAATGAACAAGCTGCAGCGAGCAAATCCAGACGACCC  
AGCTTATGATGAAAAACAAGCGCCAGTTTCAAGAAGATATCAAGGTGATGAACGACCTAGT  
AGATAAAATTATTGCAGATCGCAAAGCAAGCGGTGAACAAAGCGATGATTTATTAACGCA  
TATGCTAAACGGAAAAAGATCCAGAAACGGGTGAGCCGCTTGATGACGAGAACATTCGTA  
TCAAATTATTACATTCTTAATTGCGGGACGAAACAACAAGTGGTCTTTTATCATTTGCG  
CTGTATTTCTTAGTGAAAAATCCACATGTATTACAAAAAGCAGCAGAAGAAGCAGCACGA  
GTTCTAGTAGATCCTGTTCCAAGCTACAAACAAGTCAAACAGCTTAAATATGTCGGCATG  
GTCCTAAACGAAGCGCTGCGCTTATGGCCAAGTCTCTGCGTTTTCCCTATATGCAAAAAG  
AAGATACGGTGCTTGGAGGAGAATATCCTTTAGAAAAAGGCGACGAACTAATGGTTCTGA  
TTCCCTCAGCTTACCCTGATAAAACAATTTGGGGAGACGATGTGGAAGAGTTCCGTCCAG  
AGCGTTTTGAAAATCCAAGTGCATTCCGCAGCATGCGTTTAAACCGTTTGGAAACGGTC  
AGCGTGCGTGTATCGGTCAGCAGTTCGCTCTTCATGAAGCAACGCTGGTACTTGGTATGAT  
GCTAAACACTTTGACTTTGAAGATCATAAACTACGAGCTGGATATTAAGAACTT**TT**  
**AACGTTAAACCTGAAGGCTTTGTGGTAAAAGCAAAATCGAAAAAATTCCGCTTGGCGG**  
**TATTCCTT**CACCTAGCACTGAACAGTCTGCTAAAAAAGTACGCAAAAAGGCAGAAAACGC  
TCATAATACGCCGCTGCTTGTGCTATACGGTTCAAATATGGGAACAGCTGAAGGAACGGC  
GCGTGATTTAGCAGATATTGCAATGAGCAAAGGATTTGCACCGCAGGTCGCAACGCTTGA  
 TTCACACGCCGAAATCTTCCGCGCAAGGAGCTGTATTAATTGTAACGGCGTCTTATAAC  
GGTCATCCGCCTGATAACGCAAAGCAATTTGTCGACTGGTTAGACCAAGCGTCTGCTGAT  
GAAGTAAAAGGCGTTCGCTACTCCGATTTGGATGCGGCGATAAAAACTGGGCTACTACG  
TATCAAAAAGTGCCTGCTTTTATCGATGAAACGCTTGCCGCTAAAGGGGCAGAAAACATC  
GCTGACCGCGGTGAAGCAGATGCAAGCGACGACTTTGAAGGCACATATGAAGAATGGCG  
TGAACATATGTGGAGTGACGTAGCAGCCTACTTTAACCTCGACATTGAAAACAGTGAAGA  
TAATAAATCTACTCTTTCACTTCAATTTGTCGACAGCGCCGCGGATATGCCGCTTGCGAAA  
ATGCACGGTGCCTTTTCAACGAACGTCGTAGCAAGCAAAGAAGCTTCAACAGCCAGGCAGT  
GCACGAAGCACGCGACATCTTGAATTGAACTTCCAAAAGAAGCTTCTTATCAAGAAGGA  
GATCATTTAGGTGTTATTCCTCGAACTATGAAGGAATAGTAAACCGTGTAACAGCAAGG  
TTCCGCTAGATGCATCACAGCAAATCCGTAGCAAGCAGAAAGAAAGAAAATTAGCTCAT  
TTGCCACTCGTAAAACAGTATCCGTAGAAGAGCTTCTGCAATACGTGGAGCTTCAAGAT  
CCTGTTACGCGCACGCAGCTTCGCGCAATGGCTGCTAAAACGGTCTGCCCGCCGCATAAA  
GTAGAGCTTGAAGCCTTGCTTGAAGAAGCAAGCCTACAAAGAACAAGTGCTGGCAAAACGT  
TTAACAATGCTTGAAGTCTTGAAAAATACCCGGCGTGTGAAATGAAATTCAGCGAATTT  
ATCGCCCTTTCGCAAGCATAACGCCGCGCTATTACTCGATTTCTTCATCACCTCGTGTGCA  
TGAAAAACAAGCAAGCATCACGGTCAGCGTTGTCTCAGGAGAAGCGTGGAGCGGATATG  
GAGAATATAAAGGAATTGCGTCGAACTATCTTGCCGAGCTGCAAGAAGGAGATACGATTA  
CGTGCTTTATTTCCACACCGCAGTCAGAATTTACGCTGCCAAAAGACCCTGAAACGCCGCT  
TATCATGGTCGACCGGGAACAGGCGTCGCGCCGTTTAGAGGCTTTGTGCAGGCGCGCAA  
ACAGCTAAAAGAACAAGGACAGTCACTTGGAGAAGCACATTTATACTTCGGCTGCCGTTT  
ACCTCATGAAGACTATCTGTATCAAGAAGAGCTTGAAAAACGCCCAAAGCGAAGGCATCAT  
TACGCTTCATACCGCTTTTTCTCGCATGCCAAATCAGCCGAAAACATACGTTTCAGCACGTA  
ATGGAACAAGACGGCAAGAAATTGATTGAACTTCTTGATCAAGGAGCGCACTTCTATATT  
TGCGGAGACGGAAGCCAAATGGCACCTGCCGTTGAAGCAACGCTTATGAAAAGCTATGCT  
GACGTTACCAAGTGAGTGAAGCAGACGCTCGCTTATGGCTGCAGCAGCTAGAAGAAAA  
GGCCGATACGCAAAAAGACGTGTGGGCTGGGTAA

**Fig. S1.** The plasmid pRSFduet-1 harboring P450-BM3 gene (GenBank accession number: NZ\_CP009920.1) with a total length of 3222 bp. The heme domain sequence of P450-BM3 is underlined, the target positions are bold-marked.

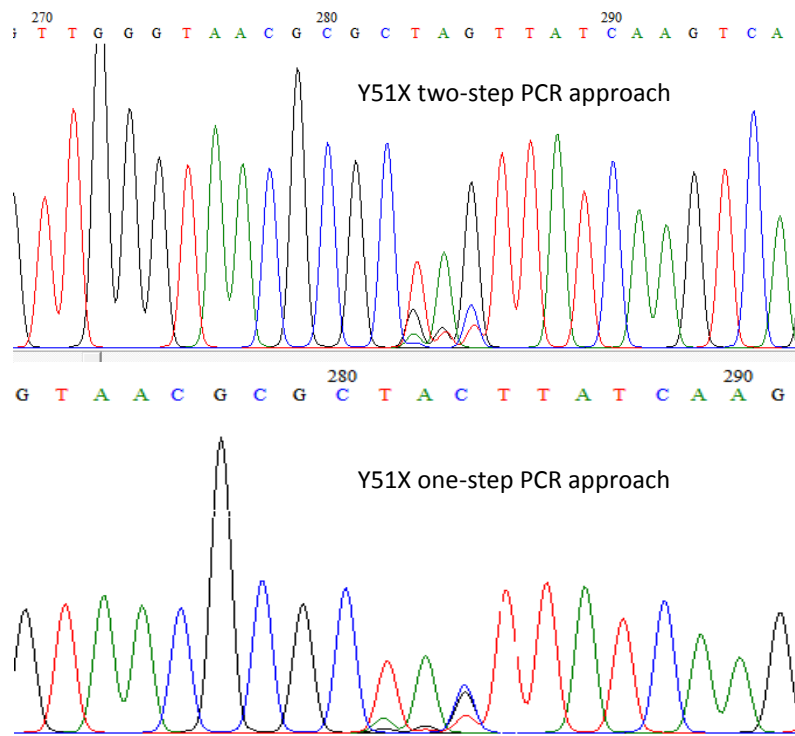

**Fig. S2.** Sequencing chromatograms for NNK-based library Y51X generated from one-step PCR or two-step PCR processes.

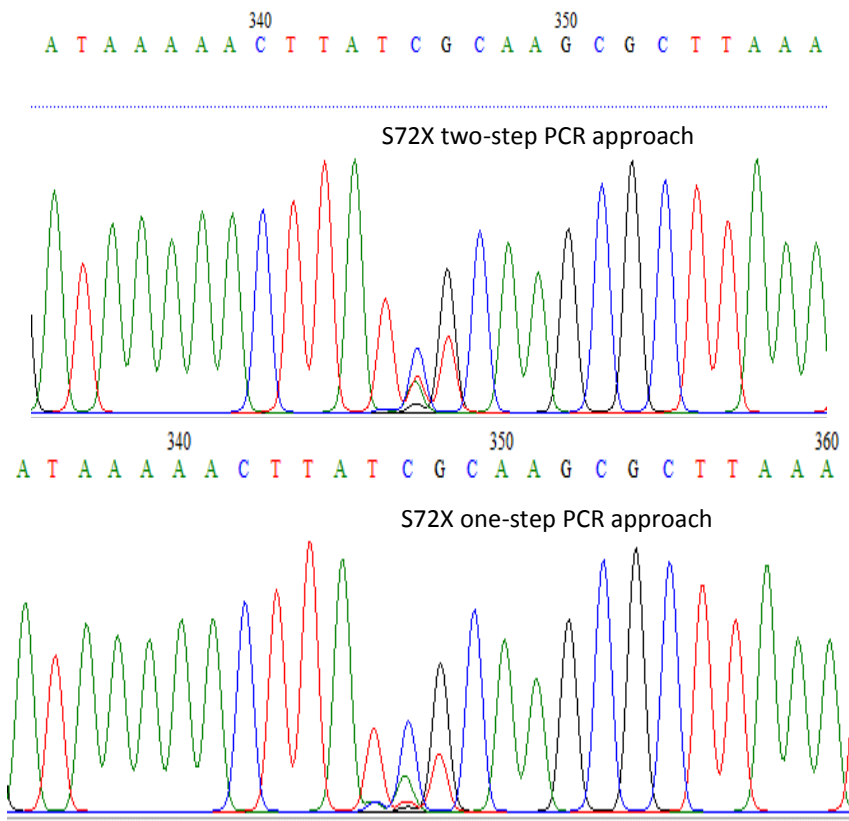

**Fig. S3.** Sequencing chromatograms for NNK-based library S72X generated from one-step PCR or two-step PCR processes.

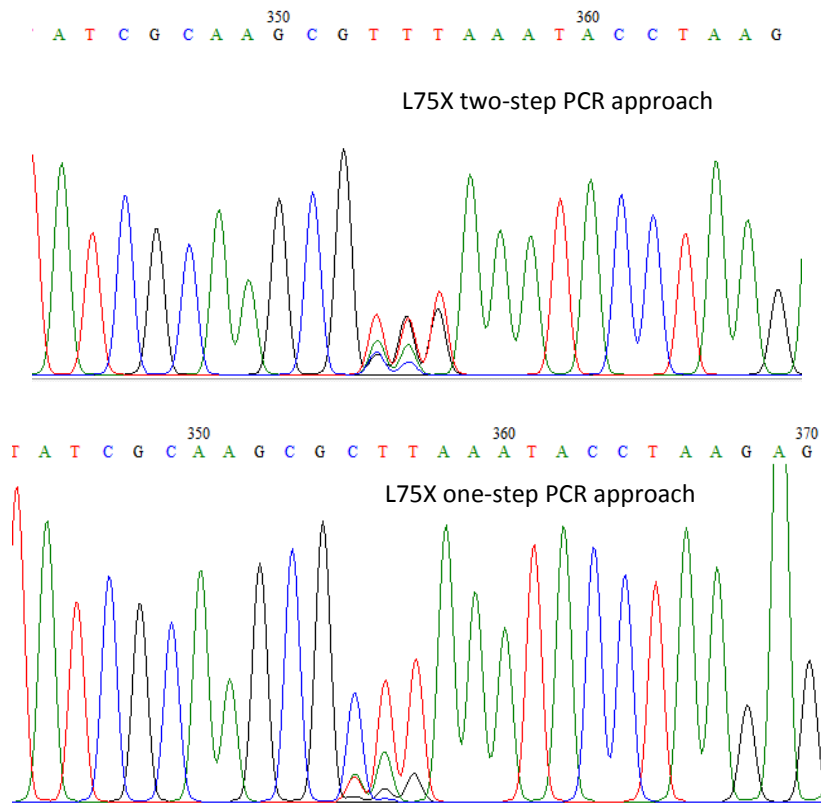

**Fig. S4.** Sequencing chromatograms for NNK-based library L75X generated from one-step PCR or two-step PCR processes.

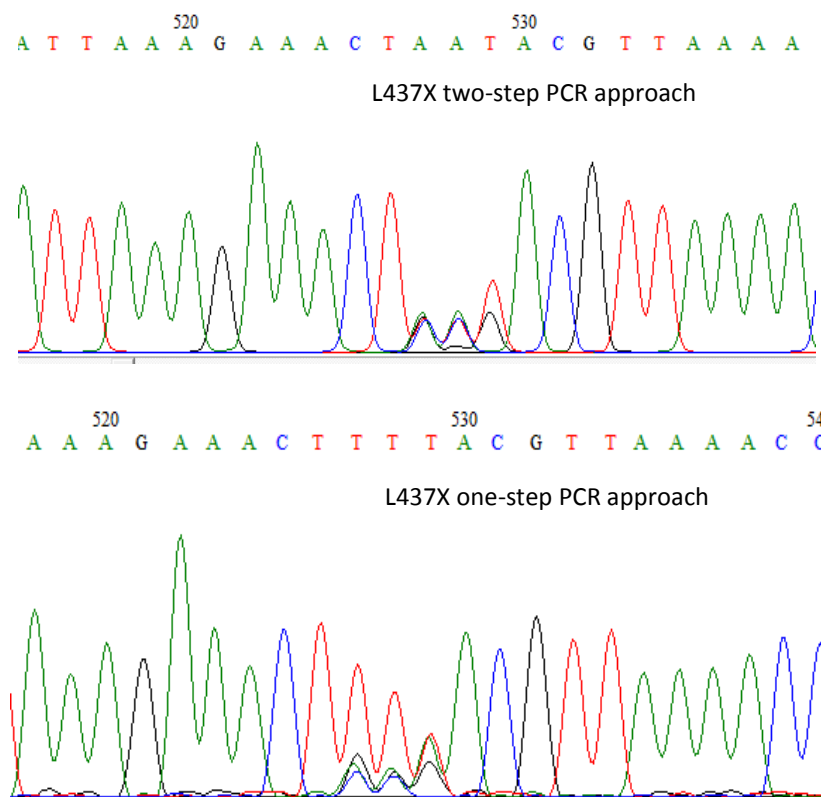

**Fig. S5.** Sequencing chromatograms for NNK-based library L437X generated from one-step PCR or two-step PCR processes.



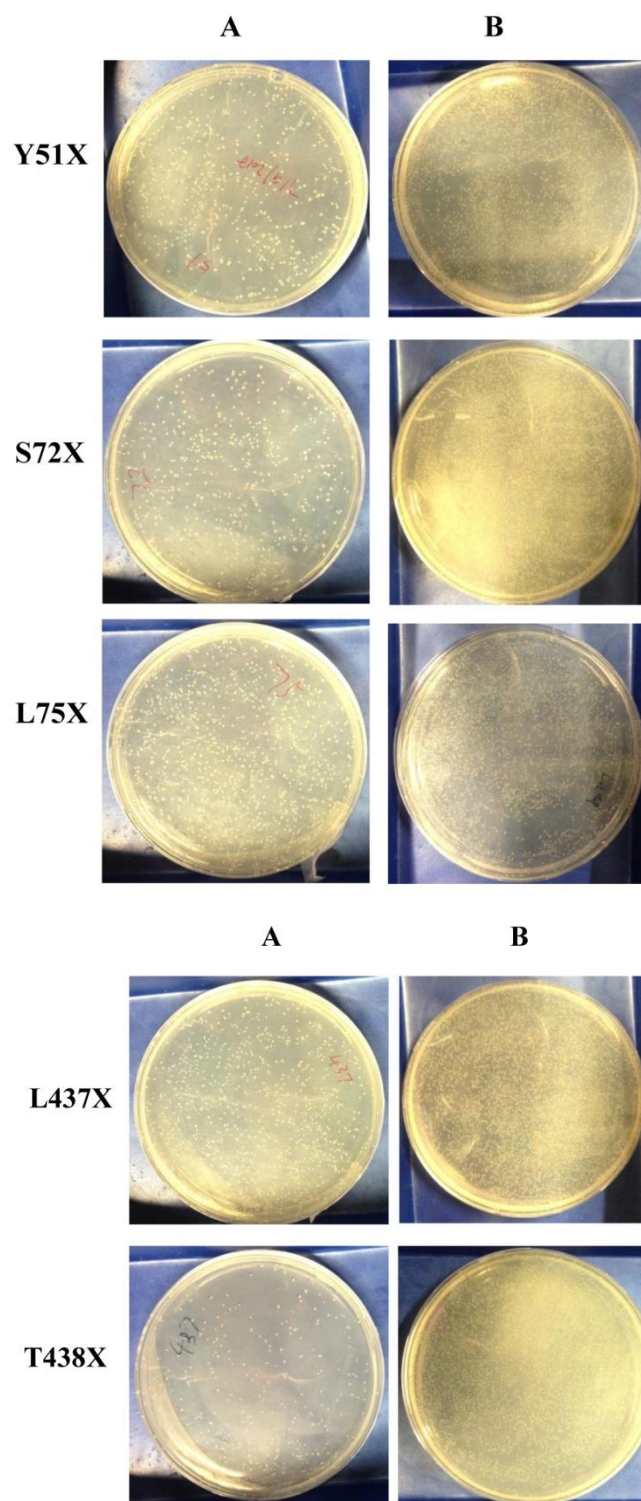

**Fig. S7.** Comparison of number of colonies developed on the agar plates for different NNK-based SSM libraries. (A) SSM libraries constructed by partially over-lapped primer in one-step PCR process; (B) SSM libraries constructed by non-overlapping primer in two-step PCR process.

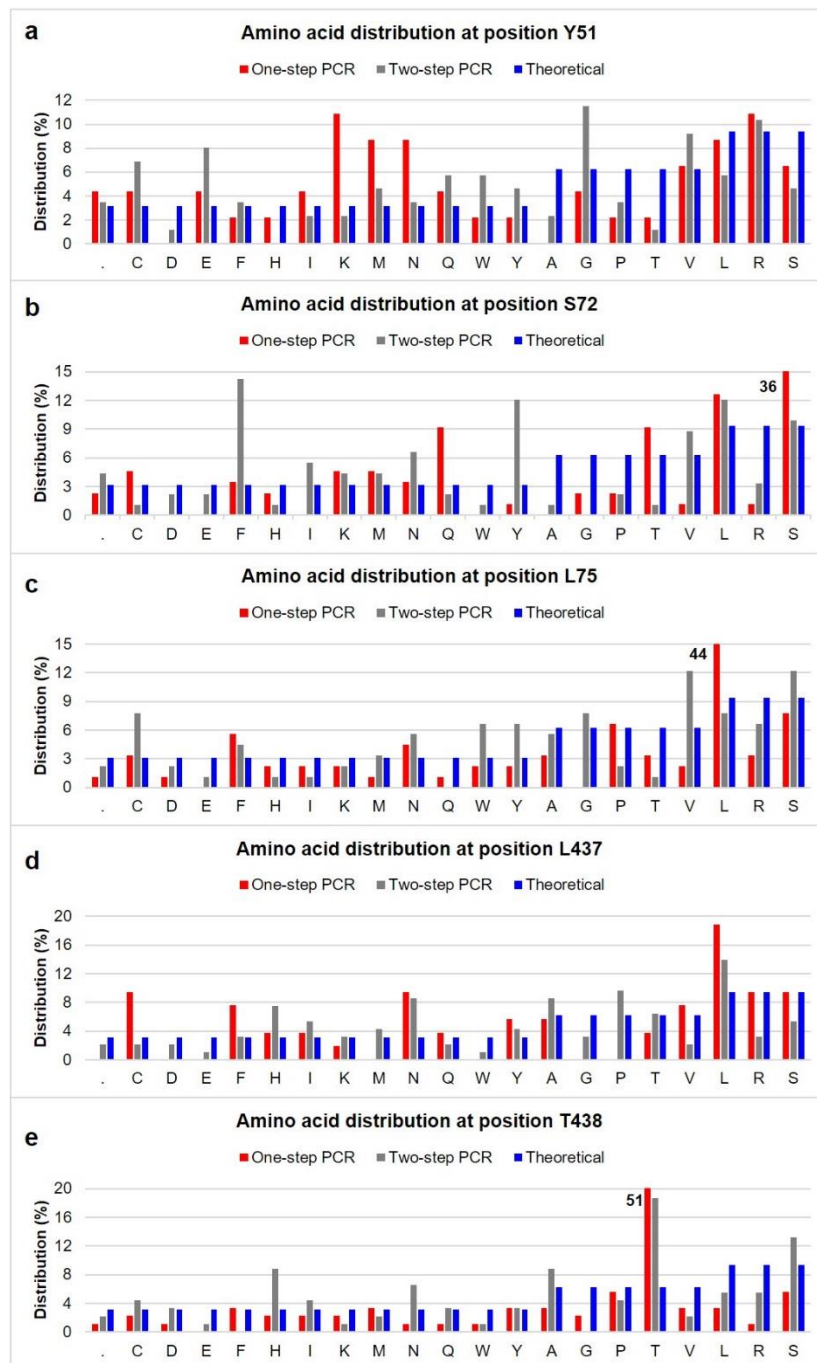

**Fig. S8.** Comparison of amino acid distribution for different positions (Y51, S72, L75, L437 and T438) for both one-step PCR and two-step PCR methods.



**Table S1.** Sequence of primers used in this study.

| libraries    | Wild-type code | Primer               | Primer sequence from 5' to 3'                       |                                               |
|--------------|----------------|----------------------|-----------------------------------------------------|-----------------------------------------------|
| One-step PCR | Y51X           | Forward              | GGGTAACGCGC <b>N</b> KTATCAAGTCAGCGTCTAATTAAG       |                                               |
|              |                | Reverse              | TGACTTGATAAM <b>N</b> NGCGGTTACCCAACCAGGCGCCTC      |                                               |
|              | S72X           | Forward              | GATAAAAACTTAN <b>N</b> KCAAGCGCTTAAATACCTAAGAGAATTC |                                               |
|              |                | Reverse              | TTAAGCGCTTGM <b>N</b> NTAAGTTTTATCAAAGCGTGATTCATC   |                                               |
|              | L75X           | Forward              | CTTATCGCAAGCG <b>N</b> KAAATACCTAAGAGAATTCCTAGG     |                                               |
|              |                | Reverse              | CTTAGGTATTTM <b>N</b> NCGCTTGCATAAGTTTTATCAAAAGCG   |                                               |
|              | L437X          | Forward              | TTAAAGAAACT <b>N</b> KACGTTAAAACCTGAAGGCTTTGTGG     |                                               |
|              |                | Reverse              | CAGGTTTTAACG <b>M</b> NNAGTTTCTTTAATATCCAGCTCGTAG   |                                               |
|              | T438X          | Forward              | AAGAACTTTAN <b>N</b> KTTAAAACCTGAAGGCTTTGTGGTAAAG   |                                               |
|              |                | Reverse              | CAGGTTTTAAM <b>N</b> NTAAAGTTTCTTTAATATCCAGCTCGTAG  |                                               |
|              | Two-step PCR   | Y51X                 | Forward                                             | GGGTAACGCGC <b>N</b> KTATCAAGTCAGCGTCTAATTAAG |
|              |                |                      | Reverse <sup>b</sup>                                | CATCGCTTTGTTCCACCGCTTGCTTTGCGATCTGC           |
| S72X         |                | Forward              | GATAAAAACTTAN <b>N</b> KCAAGCGCTTAAATACCTAAGAGAATTC |                                               |
|              |                | Reverse <sup>b</sup> | CATCGCTTTGTTCCACCGCTTGCTTTGCGATCTGC                 |                                               |
| L75X         |                | Forward              | CTTATCGCAAGCG <b>N</b> KAAATACCTAAGAGAATTCCTAGG     |                                               |
|              |                | Reverse <sup>b</sup> | CATCGCTTTGTTCCACCGCTTGCTTTGCGATCTGC                 |                                               |
| L437X        |                | Forward <sup>c</sup> | GCAGATCGCAAAGCAAGCGGTGAACAAAGCGATG                  |                                               |
|              |                | Reverse              | CAGGTTTTAACG <b>M</b> NNAGTTTCTTTAATATCCAGCTCGTAG   |                                               |
| T438X        |                | Forward <sup>c</sup> | GCAGATCGCAAAGCAAGCGGTGAACAAAGCGATG                  |                                               |
|              |                | Reverse              | CAGGTTTTAAM <b>N</b> NTAAAGTTTCTTTAATATCCAGCTCGTAG  |                                               |

Bold-marked bases in the primers indicate positions that contain the mutagenic bases in the primer sequence.

<sup>a</sup> N = A, C, G, T (equimolar amounts); K = G, T (equimolar amounts); M = A, C (equimolar amounts)

<sup>b</sup> The same non-mutagenic reverse primer, which was shared for construction of libraries of Y51X, S72X and L75X.

<sup>c</sup> The same non-mutagenic forward primer (reverse and complementary form of the primer mentioned in footnote b), which was shared for libraries construction of L72X and T438X.

**Table S2.** Screening results of one-step PCR approach with partially overlapped primer for NNK-based site-saturation mutagenesis.

|    | Y51X |    | S72X |    | L75X |    | L437X |    | T438X |
|----|------|----|------|----|------|----|-------|----|-------|
| 1  | AAG  | 1  | AAG  | 1  | AAG  | 1  | AAG   | 1  | AAG   |
| 2  | AAG  | 2  | AAG  | 2  | AAG  | 2  | AAT   | 2  | AAG   |
| 3  | AAG  | 3  | AAG  | 3  | AAT  | 3  | AAT   | 3  | AAT   |
| 4  | AAG  | 4  | AAG  | 4  | AAT  | 4  | AAT   | 4  | ACG   |
| 5  | AAG  | 5  | AAT  | 5  | AAT  | 5  | AAT   | 5  | ACG   |
| 6  | AAT  | 6  | AAT  | 6  | AAT  | 6  | AAT   | 6  | ACG   |
| 7  | AAT  | 7  | AAT  | 7  | ACG  | 7  | ACG   | 7  | ACG   |
| 8  | AAT  | 8  | ACG  | 8  | ACG  | 8  | ACG   | 8  | ACG   |
| 9  | AAT  | 9  | ACG  | 9  | ACT  | 9  | AGG   | 9  | ACG   |
| 10 | ACG  | 10 | ACG  | 10 | AGG  | 10 | AGG   | 10 | ACG   |
| 11 | AGG  | 11 | ACG  | 11 | AGT  | 11 | AGT   | 11 | ACG   |
| 12 | AGG  | 12 | ACT  | 12 | ATG  | 12 | AGT   | 12 | ACG   |
| 13 | AGG  | 13 | ACT  | 13 | ATT  | 13 | ATT   | 13 | ACG   |
| 14 | AGT  | 14 | ACT  | 14 | ATT  | 14 | ATT   | 14 | ACG   |
| 15 | ATG  | 15 | ACT  | 15 | CAG  | 15 | CAG   | 15 | ACG   |
| 16 | ATG  | 16 | AGG  | 16 | CAT  | 16 | CAG   | 16 | ACG   |
| 17 | ATG  | 17 | AGT  | 17 | CAT  | 17 | CAT   | 17 | ACG   |
| 18 | ATG  | 18 | AGT  | 18 | CCG  | 18 | CAT   | 18 | ACG   |
| 19 | ATT  | 19 | ATG  | 19 | CCG  | 19 | CGG   | 19 | ACG   |
| 20 | ATT  | 20 | ATG  | 20 | CCG  | 20 | CGG   | 20 | ACG   |
| 21 | ATT  | 21 | ATG  | 21 | CCG  | 21 | CGT   | 21 | ACG   |
| 22 | CAG  | 22 | ATG  | 22 | CCT  | 22 | CTG   | 22 | ACG   |
| 23 | CAG  | 23 | CAG  | 23 | CCT  | 23 | CTT   | 23 | ACG   |
| 24 | CAT  | 24 | CAG  | 24 | CGG  | 24 | CTT   | 24 | ACG   |
| 25 | CCT  | 25 | CAG  | 25 | CGT  | 25 | GCT   | 25 | ACG   |
| 26 | CGT  | 26 | CAG  | 26 | CTG  | 26 | GCT   | 26 | ACG   |
| 27 | CGT  | 27 | CAG  | 27 | CTG  | 27 | GCT   | 27 | ACG   |
| 28 | CTT  | 28 | CAG  | 28 | CTT  | 28 | GTG   | 28 | ACG   |
| 29 | GAG  | 29 | CAG  | 29 | CTT  | 29 | GTT   | 29 | ACG   |
| 30 | GAG  | 30 | CAG  | 30 | CTT  | 30 | GTT   | 30 | ACG   |
| 31 | GGT  | 31 | CAT  | 31 | CTT  | 31 | GTT   | 31 | ACG   |
| 32 | GGT  | 32 | CAT  | 32 | CTT  | 32 | TAT   | 32 | ACG   |
| 33 | GTG  | 33 | CCG  | 33 | CTT  | 33 | TAT   | 33 | ACG   |
| 34 | GTG  | 34 | CCT  | 34 | CTT  | 34 | TAT   | 34 | ACG   |
| 35 | GTT  | 35 | CTG  | 35 | CTT  | 35 | TCG   | 35 | ACG   |
| 36 | TAC  | 36 | CTG  | 36 | CTT  | 36 | TCT   | 36 | ACG   |
| 37 | TAC  | 37 | CTT  | 37 | CTT  | 37 | TCT   | 37 | ACG   |
| 38 | TAC  | 38 | CTT  | 38 | CTT  | 38 | TGT   | 38 | ACG   |
| 39 | TAC  | 39 | CTT  | 39 | CTT  | 39 | TGT   | 39 | ACG   |
| 40 | TAC  | 40 | GAG  | 40 | CTT  | 40 | TGT   | 40 | ACG   |
| 41 | TAC  | 41 | GGG  | 41 | CTT  | 41 | TGT   | 41 | ACG   |
| 42 | TAC  | 42 | GGT  | 42 | CTT  | 42 | TGT   | 42 | ACG   |
| 43 | TAC  | 43 | TAG  | 43 | CTT  | 43 | TTA   | 43 | ACG   |
| 44 | TAC  | 44 | TAG  | 44 | CTT  | 44 | TTA   | 44 | ACG   |
| 45 | TAC  | 45 | TAT  | 45 | CTT  | 45 | TTA   | 45 | ACG   |

|    |     |    |     |    |     |    |     |    |     |
|----|-----|----|-----|----|-----|----|-----|----|-----|
| 46 | TAC | 46 | TCG | 46 | CTT | 46 | TTA | 46 | ACG |
| 47 | TAC | 47 | TCG | 47 | CTT | 47 | TTA | 47 | ACT |
| 48 | TAC | 48 | TCG | 48 | CTT | 48 | TTA | 48 | ACT |
| 49 | TAC | 49 | TCG | 49 | CTT | 49 | TTA | 49 | ACT |
| 50 | TAC | 50 | TCG | 50 | CTT | 50 | TTA | 50 | AGG |
| 51 | TAC | 51 | TCG | 51 | CTT | 51 | TTA | 51 | AGT |
| 52 | TAC | 52 | TCG | 52 | CTT | 52 | TTA | 52 | AGT |
| 53 | TAC | 53 | TCG | 53 | CTT | 53 | TTA | 53 | ATG |
| 54 | TAC | 54 | TCG | 54 | CTT | 54 | TTA | 54 | ATG |
| 55 | TAC | 55 | TCG | 55 | CTT | 55 | TTA | 55 | ATG |
| 56 | TAC | 56 | TCG | 56 | CTT | 56 | TTA | 56 | ATT |
| 57 | TAC | 57 | TCG | 57 | CTT | 57 | TTA | 57 | ATT |
| 58 | TAC | 58 | TCG | 58 | CTT | 58 | TTA | 58 | CAG |
| 59 | TAC | 59 | TCG | 59 | CTT | 59 | TTA | 59 | CAT |
| 60 | TAC | 60 | TCG | 60 | GAT | 60 | TTA | 60 | CAT |
| 61 | TAC | 61 | TCG | 61 | GCG | 61 | TTA | 61 | CCG |
| 62 | TAC | 62 | TCG | 62 | GCT | 62 | TTA | 62 | CCG |
| 63 | TAC | 63 | TCG | 63 | GCT | 63 | TTA | 63 | CCG |
| 64 | TAC | 64 | TCG | 64 | GTG | 64 | TTA | 64 | CCG |
| 65 | TAC | 65 | TCG | 65 | GTT | 65 | TTA | 65 | CCG |
| 66 | TAC | 66 | TCG | 66 | TAA | 66 | TTA | 66 | CCG |
| 67 | TAC | 67 | TCG | 67 | TAT | 67 | TTA | 67 | CTG |
| 68 | TAC | 68 | TCG | 68 | TAT | 68 | TTA | 68 | GAG |
| 69 | TAC | 69 | TCG | 69 | TCT | 69 | TTA | 69 | GCG |
| 70 | TAC | 70 | TCG | 70 | TCT | 70 | TTA | 70 | GCG |
| 71 | TAC | 71 | TCG | 71 | TCT | 71 | TTA | 71 | GCT |
| 72 | TAC | 72 | TCG | 72 | TCT | 72 | TTA | 72 | GGG |
| 73 | TAC | 73 | TCG | 73 | TCT | 73 | TTA | 73 | GGG |
| 74 | TAC | 74 | TCG | 74 | TCT | 74 | TTA | 74 | GTG |
| 75 | TAC | 75 | TCG | 75 | TGG | 75 | TTA | 75 | GTT |
| 76 | TAC | 76 | TCG | 76 | TGG | 76 | TTA | 76 | GTT |
| 77 | TAC | 77 | TCT | 77 | TGT | 77 | TTA | 77 | TAG |
| 78 | TAC | 78 | TCT | 78 | TGT | 78 | TTA | 78 | TAT |
| 79 | TAC | 79 | TCT | 79 | TGT | 79 | TTA | 79 | TAT |
| 80 | TAG | 80 | TGC | 80 | TTG | 80 | TTA | 80 | TAT |
| 81 | TAG | 81 | TGT | 81 | TTG | 81 | TTA | 81 | TCT |
| 82 | TAT | 82 | TGT | 82 | TTG | 82 | TTA | 82 | TCT |
| 83 | TCG | 83 | TGT | 83 | TTG | 83 | TTG | 83 | TCT |
| 84 | TCT | 84 | TTG | 84 | TTG | 84 | TTG | 84 | TGG |
| 85 | TGG | 85 | TTG | 85 | TTG | 85 | TTG | 85 | TGT |
| 86 | TGT | 86 | TTG | 86 | TTG | 86 | TTG | 86 | TTG |
| 87 | TGT | 87 | TTG | 87 | TTT | 87 | TTG | 87 | TTG |
| 88 | TTG | 88 | TTG | 88 | TTT | 88 | TTG | 88 | TTG |
| 89 | TTG | 89 | TTG | 89 | TTT | 89 | TTG | 89 | TTT |
| 90 | TTG | 90 | TTT | 90 | TTT | 90 | TTT | 90 | TTT |
| 91 | TTT | 91 | TTT | 91 | TTT | 91 | TTT | 91 | TTT |
|    |     | 92 | TTT |    |     | 92 | TTT |    |     |
|    |     |    |     |    |     | 93 | TTT |    |     |

**Table S3.** Screening results of two-step PCR approach with non-overlapping primers for NNK-based site-saturation mutagenesis.

|    | Y51X |    | S72X |    | L75X |    | L437X |    | T438X |
|----|------|----|------|----|------|----|-------|----|-------|
| 1  | AAG  | 1  | AAG  | 1  | AAG  | 1  | AAG   | 1  | AAG   |
| 2  | AAG  | 2  | AAG  | 2  | AAG  | 2  | AAG   | 2  | AAT   |
| 3  | AAT  | 3  | AAG  | 3  | AAT  | 3  | AAG   | 3  | AAT   |
| 4  | AAT  | 4  | AAG  | 4  | AAT  | 4  | AAT   | 4  | AAT   |
| 5  | AAT  | 5  | AAT  | 5  | AAT  | 5  | AAT   | 5  | AAT   |
| 6  | ACG  | 6  | AAT  | 6  | AAT  | 6  | AAT   | 6  | AAT   |
| 7  | AGG  | 7  | AAT  | 7  | AAT  | 7  | AAT   | 7  | ACG   |
| 8  | AGG  | 8  | AAT  | 8  | ACT  | 8  | AAT   | 8  | ACG   |
| 9  | AGG  | 9  | AAT  | 9  | AGG  | 9  | AAT   | 9  | ACG   |
| 10 | AGG  | 10 | AAT  | 10 | AGG  | 10 | AAT   | 10 | ACG   |
| 11 | AGT  | 11 | ACG  | 11 | AGG  | 11 | AAT   | 11 | ACG   |
| 12 | AGT  | 12 | AGG  | 12 | AGT  | 12 | ACT   | 12 | ACG   |
| 13 | ATG  | 13 | AGT  | 13 | AGT  | 13 | ACT   | 13 | ACG   |
| 14 | ATG  | 14 | AGT  | 14 | AGT  | 14 | ACT   | 14 | ACG   |
| 15 | ATG  | 15 | AGT  | 15 | AGT  | 15 | ACT   | 15 | ACG   |
| 16 | ATG  | 16 | ATG  | 16 | ATG  | 16 | ACT   | 16 | ACT   |
| 17 | ATT  | 17 | ATG  | 17 | ATG  | 17 | ACT   | 17 | ACT   |
| 18 | ATT  | 18 | ATG  | 18 | ATG  | 18 | ATG   | 18 | ACT   |
| 19 | CAG  | 19 | ATG  | 19 | ATT  | 19 | ATG   | 19 | ACT   |
| 20 | CAG  | 20 | ATT  | 20 | CAT  | 20 | ATG   | 20 | ACT   |
| 21 | CAG  | 21 | ATT  | 21 | CCG  | 21 | ATG   | 21 | ACT   |
| 22 | CAG  | 22 | ATT  | 22 | CCT  | 22 | ATT   | 22 | ACT   |
| 23 | CAG  | 23 | ATT  | 23 | CGG  | 23 | ATT   | 23 | ACT   |
| 24 | CCG  | 24 | ATT  | 24 | CGT  | 24 | ATT   | 24 | AGG   |
| 25 | CCT  | 25 | CAG  | 25 | CGT  | 25 | ATT   | 25 | AGT   |
| 26 | CCT  | 26 | CAT  | 26 | CTG  | 26 | ATT   | 26 | AGT   |
| 27 | CGG  | 27 | CCG  | 27 | CTG  | 27 | CAG   | 27 | AGT   |
| 28 | CGT  | 28 | CCT  | 28 | CTT  | 28 | CAG   | 28 | ATG   |
| 29 | CGT  | 29 | CGT  | 29 | CTT  | 29 | CAT   | 29 | ATG   |
| 30 | CGT  | 30 | CGT  | 30 | GAG  | 30 | CAT   | 30 | ATT   |
| 31 | CGT  | 31 | CTG  | 31 | GAT  | 31 | CAT   | 31 | ATT   |
| 32 | CTT  | 32 | CTG  | 32 | GAT  | 32 | CAT   | 32 | ATT   |
| 33 | GAG  | 33 | CTT  | 33 | GCG  | 33 | CAT   | 33 | ATT   |
| 34 | GAG  | 34 | GAG  | 34 | GCG  | 34 | CAT   | 34 | CAG   |
| 35 | GAG  | 35 | GAG  | 35 | GCT  | 35 | CAT   | 35 | CAG   |
| 36 | GAG  | 36 | GAG  | 36 | GCT  | 36 | CCG   | 36 | CAG   |
| 37 | GAG  | 37 | GAT  | 37 | GCT  | 37 | CCG   | 37 | CAG   |
| 38 | GAG  | 38 | GAT  | 38 | GGG  | 38 | CCT   | 38 | CAT   |
| 39 | GAG  | 39 | GAT  | 39 | GGG  | 39 | CCT   | 39 | CAT   |
| 40 | GAT  | 40 | GCT  | 40 | GGG  | 40 | CCT   | 40 | CAT   |
| 41 | GCG  | 41 | GTC  | 41 | GGT  | 41 | CCT   | 41 | CAT   |
| 42 | GCT  | 42 | GTG  | 42 | GGT  | 42 | CCT   | 42 | CAT   |
| 43 | GGG  | 43 | GTT  | 43 | GGT  | 43 | CCT   | 43 | CAT   |
| 44 | GGG  | 44 | GTT  | 44 | GGT  | 44 | CCT   | 44 | CAT   |
| 45 | GGG  | 45 | GTT  | 45 | GTG  | 45 | CGG   | 45 | CAT   |

|    |     |    |     |    |     |     |     |    |     |
|----|-----|----|-----|----|-----|-----|-----|----|-----|
| 46 | GGG | 46 | GTT | 46 | GTG | 46  | CGG | 46 | CCG |
| 47 | GGG | 47 | GTT | 47 | GTG | 47  | CGT | 47 | CCT |
| 48 | GGG | 48 | GTT | 48 | GTG | 48  | CTG | 48 | CCT |
| 49 | GGT | 49 | TAG | 49 | GTG | 49  | CTT | 49 | CCT |
| 50 | GGT | 50 | TAG | 50 | GTT | 50  | CTT | 50 | CGG |
| 51 | GGT | 51 | TAG | 51 | GTT | 51  | CTT | 51 | CGT |
| 52 | GGT | 52 | TAG | 52 | GTT | 52  | CTT | 52 | CGT |
| 53 | GTG | 53 | TAT | 53 | GTT | 53  | CTT | 53 | CGT |
| 54 | GTG | 54 | TAT | 54 | GTT | 54  | CTT | 54 | CTG |
| 55 | GTG | 55 | TAT | 55 | GTT | 55  | GAG | 55 | CTT |
| 56 | GTG | 56 | TAT | 56 | TAG | 56  | GAT | 56 | CTT |
| 57 | GTG | 57 | TAT | 57 | TAG | 57  | GAT | 57 | GAG |
| 58 | GTG | 58 | TAT | 58 | TAT | 58  | GCG | 58 | GAT |
| 59 | GTT | 59 | TAT | 59 | TAT | 59  | GCG | 59 | GAT |
| 60 | GTT | 60 | TAT | 60 | TAT | 60  | GCG | 60 | GAT |
| 61 | TAC | 61 | TAT | 61 | TAT | 61  | GCT | 61 | GCG |
| 62 | TAC | 62 | TAT | 62 | TAT | 62  | GCT | 62 | GCG |
| 63 | TAC | 63 | TAT | 63 | TAT | 63  | GCT | 63 | GCG |
| 64 | TAC | 64 | TCG | 64 | TCG | 64  | GCT | 64 | GCG |
| 65 | TAG | 65 | TCG | 65 | TCT | 65  | GCT | 65 | GCT |
| 66 | TAG | 66 | TCG | 66 | TCT | 66  | GGG | 66 | GCT |
| 67 | TAG | 67 | TCG | 67 | TCT | 67  | GGT | 67 | GCT |
| 68 | TAT | 68 | TCG | 68 | TCT | 68  | GGT | 68 | GCT |
| 69 | TAT | 69 | TCT | 69 | TCT | 69  | GTA | 69 | GTT |
| 70 | TAT | 70 | TGG | 70 | TCT | 70  | GTG | 70 | GTT |
| 71 | TAT | 71 | TGT | 71 | TGG | 71  | TAG | 71 | TAG |
| 72 | TCG | 72 | TTG | 72 | TGG | 72  | TAG | 72 | TAG |
| 73 | TCT | 73 | TTG | 73 | TGG | 73  | TAT | 73 | TAT |
| 74 | TGG | 74 | TTG | 74 | TGG | 74  | TAT | 74 | TAT |
| 75 | TGG | 75 | TTG | 75 | TGG | 75  | TAT | 75 | TAT |
| 76 | TGG | 76 | TTG | 76 | TGG | 76  | TAT | 76 | TCG |
| 77 | TGG | 77 | TTG | 77 | TGT | 77  | TCG | 77 | TCT |
| 78 | TGG | 78 | TTG | 78 | TGT | 78  | TCT | 78 | TCT |
| 79 | TGT | 79 | TTG | 79 | TGT | 79  | TCT | 79 | TCT |
| 80 | TGT | 80 | TTT | 80 | TGT | 80  | TCT | 80 | TCT |
| 81 | TGT | 81 | TTT | 81 | TGT | 81  | TCT | 81 | TCT |
| 82 | TGT | 82 | TTT | 82 | TGT | 82  | TGG | 82 | TCT |
| 83 | TGT | 83 | TTT | 83 | TGT | 83  | TGT | 83 | TCT |
| 84 | TGT | 84 | TTT | 84 | TTG | 84  | TGT | 84 | TCT |
| 85 | TTG | 85 | TTT | 85 | TTG | 85  | TTA | 85 | TGG |
| 86 | TTG | 86 | TTT | 86 | TTG | 86  | TTA | 86 | TGT |
| 87 | TTG | 87 | TTT | 87 | TTG | 87  | TTA | 87 | TGT |
| 88 | TTG | 88 | TTT | 88 | TTG | 88  | TTA | 88 | TGT |
| 89 | TTT | 89 | TTT | 89 | TTT | 89  | TTA | 89 | TGT |
| 90 | TTT | 90 | TTT | 90 | TTT | 90  | TTG | 90 | TTG |
| 91 | TTT | 91 | TTT | 91 | TTT | 91  | TTT | 91 | TTG |
|    |     | 92 | TTT | 92 | TTT | 92  | TTT |    |     |
|    |     |    |     |    | 93  | TTT |     |    |     |
